# Supplementary material
Source: publisher site journal article supplement (https://www.dovepress.com/get_supplementary_file.php?f=343479.docx)
Supplement: Supplementary file 1 [file get_supplementary_file.php]

**Supporting Information**

**Development and Preclinical Evaluation of a Near-Infrared Fluorescence Probe** **Based on** **Tailored** **Hepatitis B Core Particles for** **Imaging-Guided Surgery in Breast Cancer**

Rui-Qin Yang1,2,4, Min-Chen3,4, Qiang Zhang5, Yi-Yang Gao1,2,4, Kang-Liang Lou1,2,4, Tong-Tong Lin5, Wen-He Huang1,2, Yun-Zhu Zeng6, Yong-Qu Zhang1,2,4, Yong-Ying Dang1,2,4, Lei-Ren5*, Guo-Jun Zhang1,2,3*****

1. Cancer Center & Department of Breast and Thyroid Surgery, Xiang’an Hospital of Xiamen University, School of Medicine, Xiamen University, Xiamen, Fujian, China;
2. Key Laboratory for Endocrine-Related Cancer Precision Medicine of Xiamen, Xiang’an Hospital of Xiamen University, Xiamen, Fujian, China;
3. Cancer Research Center, School of Medicine, Xiamen University, Xiamen, Fujian, China;
4. Clinical Central Research Core, Xiang’an Hospital of Xiamen University, Xiamen, Fujian, China;
5. State Key Lab of Physical Chemistry of Solid Surface, College of Materials, Xiamen University, Xiamen, Fujian, China;
6. The pathology department, Cancer Hospital, Shantou University Medical College, Shantou, Guangdong, China.

Corresponding author: Guo-Jun Zhang, MD, PhD, Tel: 0086-592-2889988, Fax: 0086-592-2889202, Email: gjzhang@xah.xmu.edu.cn.

**Data S1.****The peptide sequence of the HBc183 and RGD-HBc160,** **the red part indicated amino acids changing.**

***HBc183:*** MDIDPYKEFGATVELLSFLPSDFFPSVRDLLDTASALYREALESPEHCSPHHTALRQAILCWGELMTLATWVGNNLEDPASRDLVVNYVNTNMGLKIRQLLWFHISCLTFGRETVLEYLVSFGVWIRTPPAYRPPNAPILSTLPETTVVRRRDRGRSPRRRTPSPRRRRSQSPRRRRSQSRESQC.

***RGD-HBc160:*** MDIDHYKEFGASVELLSFLPSDFFPSIRDLLDTASALYREALESPEHCSPHHTALRQAILCWGELMNLATWVGSNLEDGTSGSSGSGSGGSGSGGGGRGDGGGGSGSGGSGSGSSGSTGKSRELVVGYVNVNMGLKIRQILWFHISCLTFGRETVLEYLVSFGVWIRTPPAYRPPNAPILSTLPETTVVRRRGRSPRRRTPSPRRRT


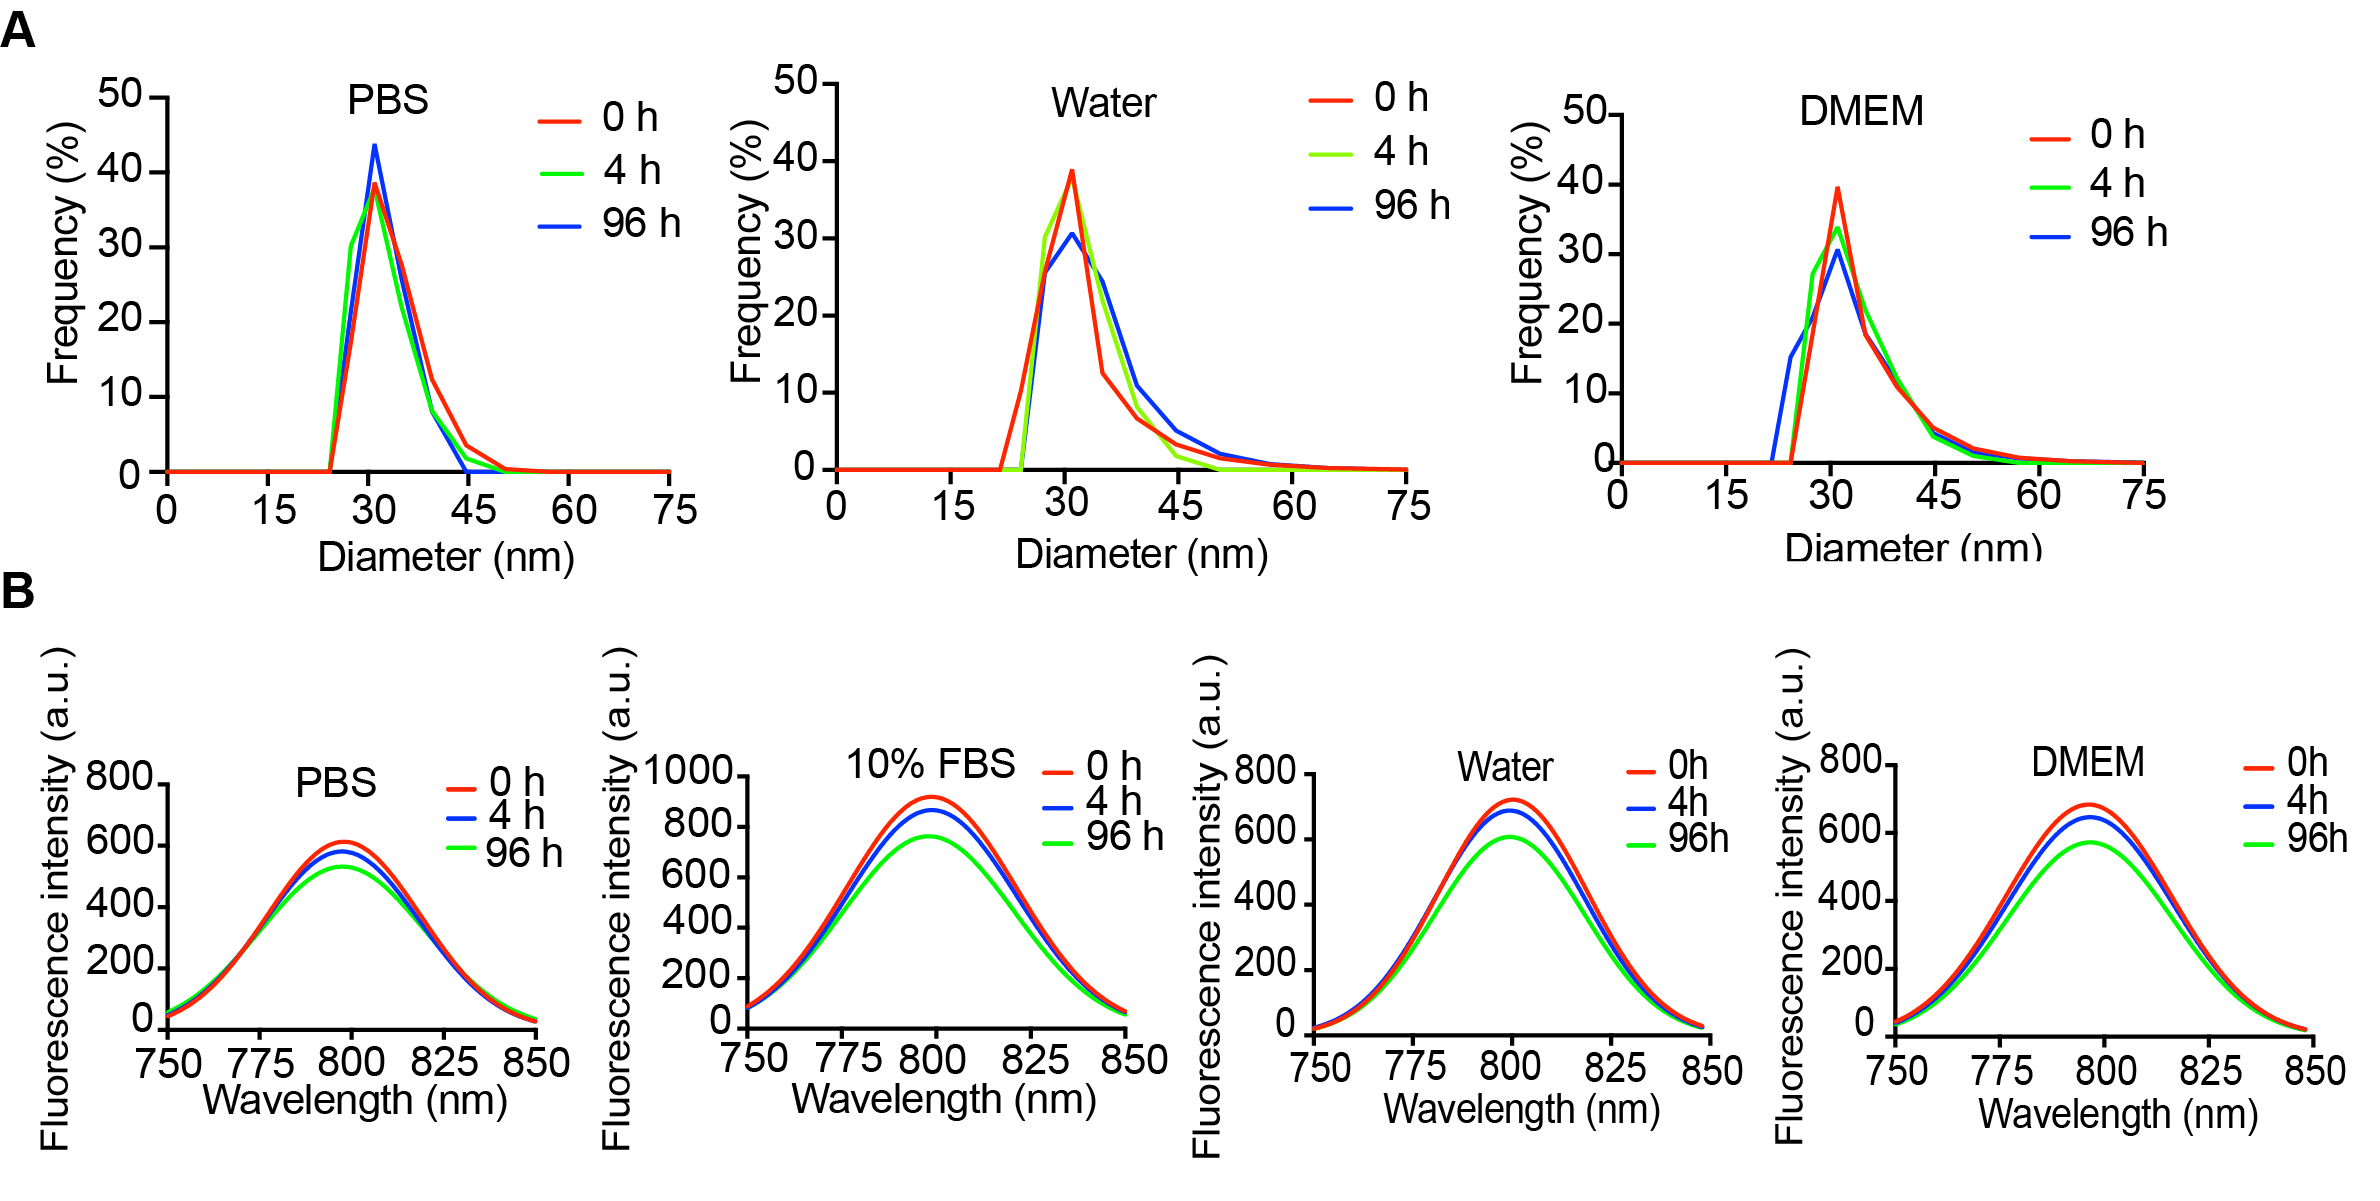


**Figure S1****.** Diameter distribution of RGD-HBc160/ICG in PBS, water and DMEM **(A)** and the fluorescence emission spectra in PBS, 10% FBS, water and DMEM **(B)** at different time points.


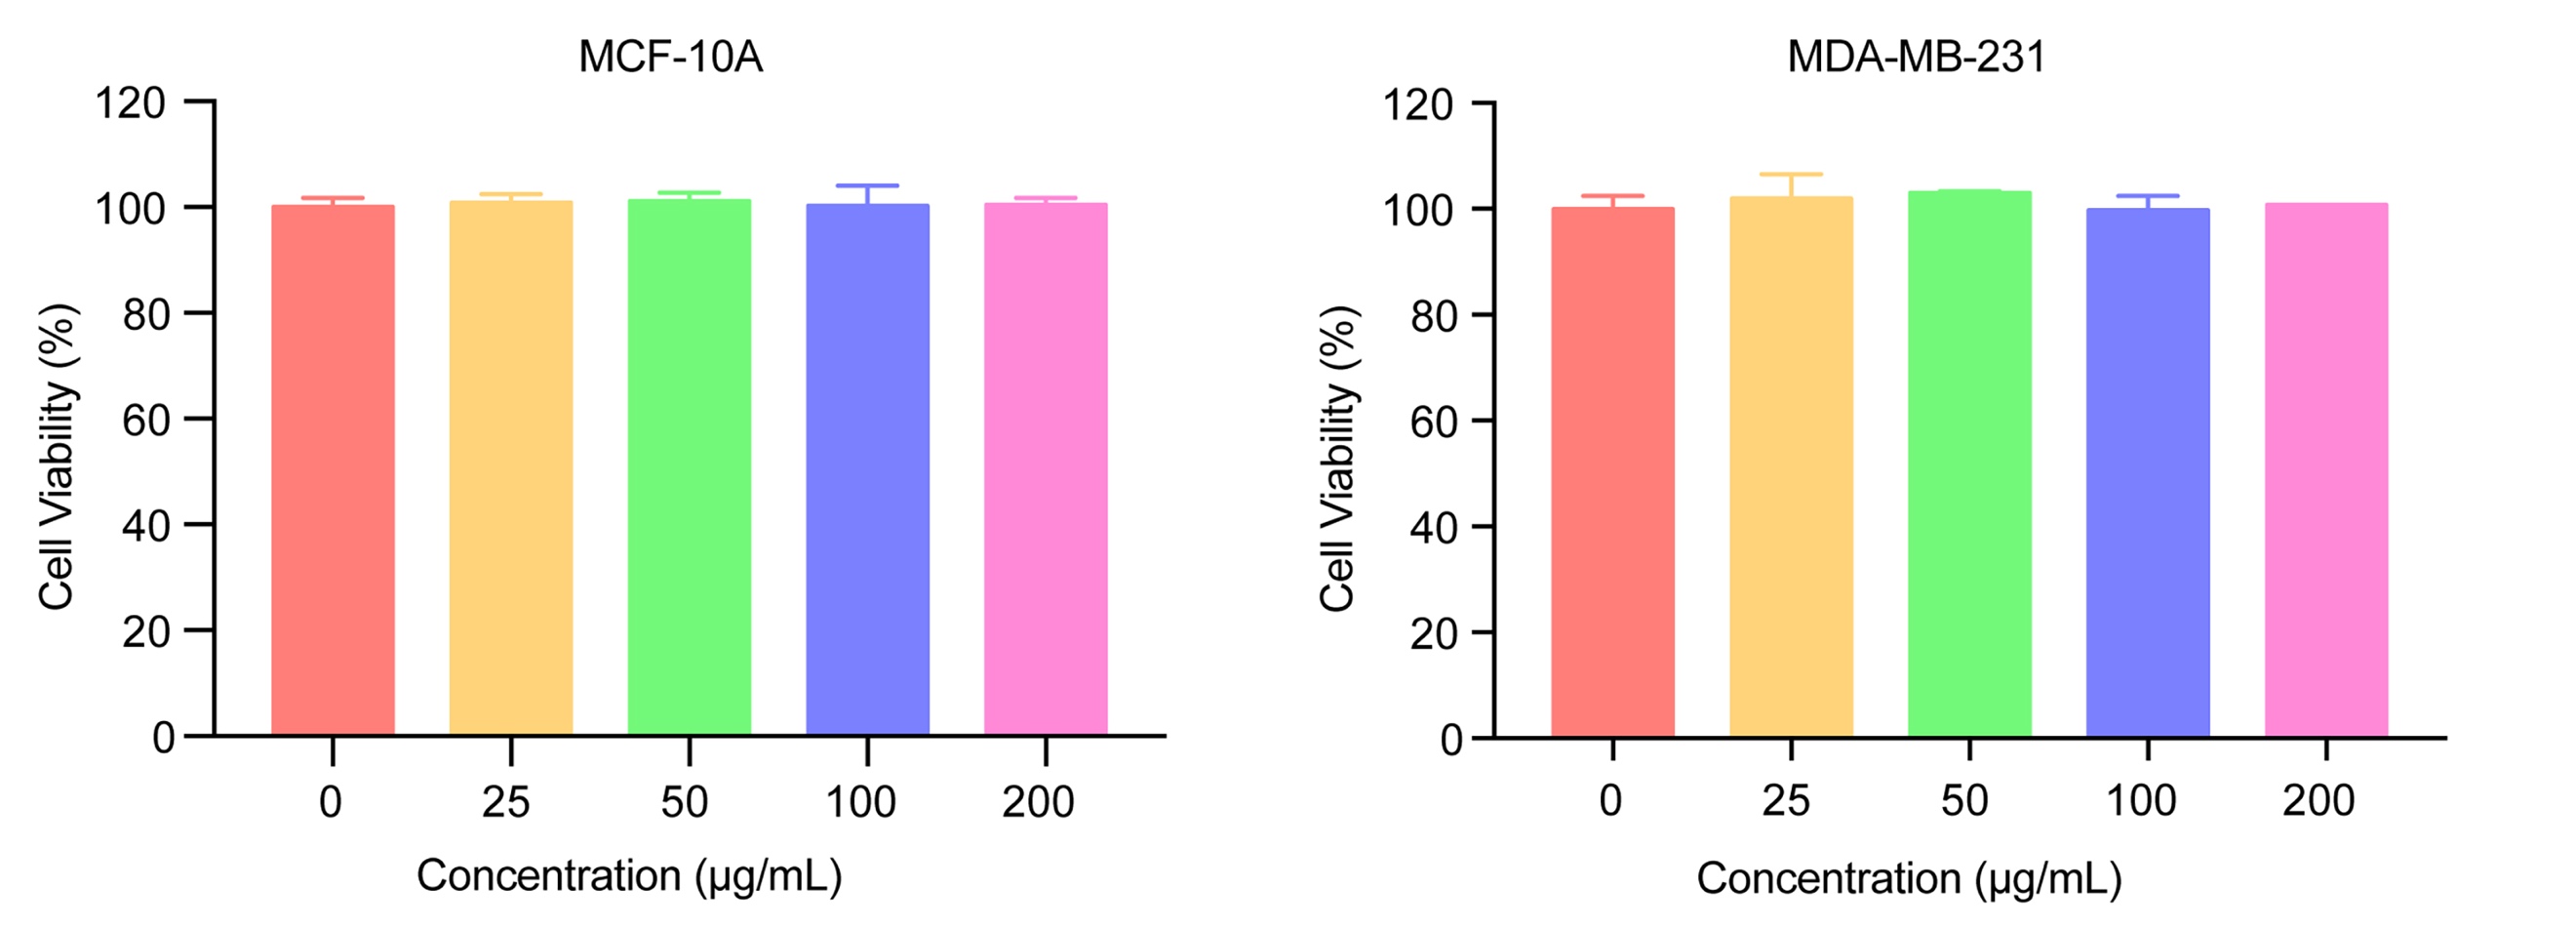


**Figure S2.** Viability of MDA-MB-231 and MCF-10A cells incubated with RGD-HBc160/ICG various concentrations.

**
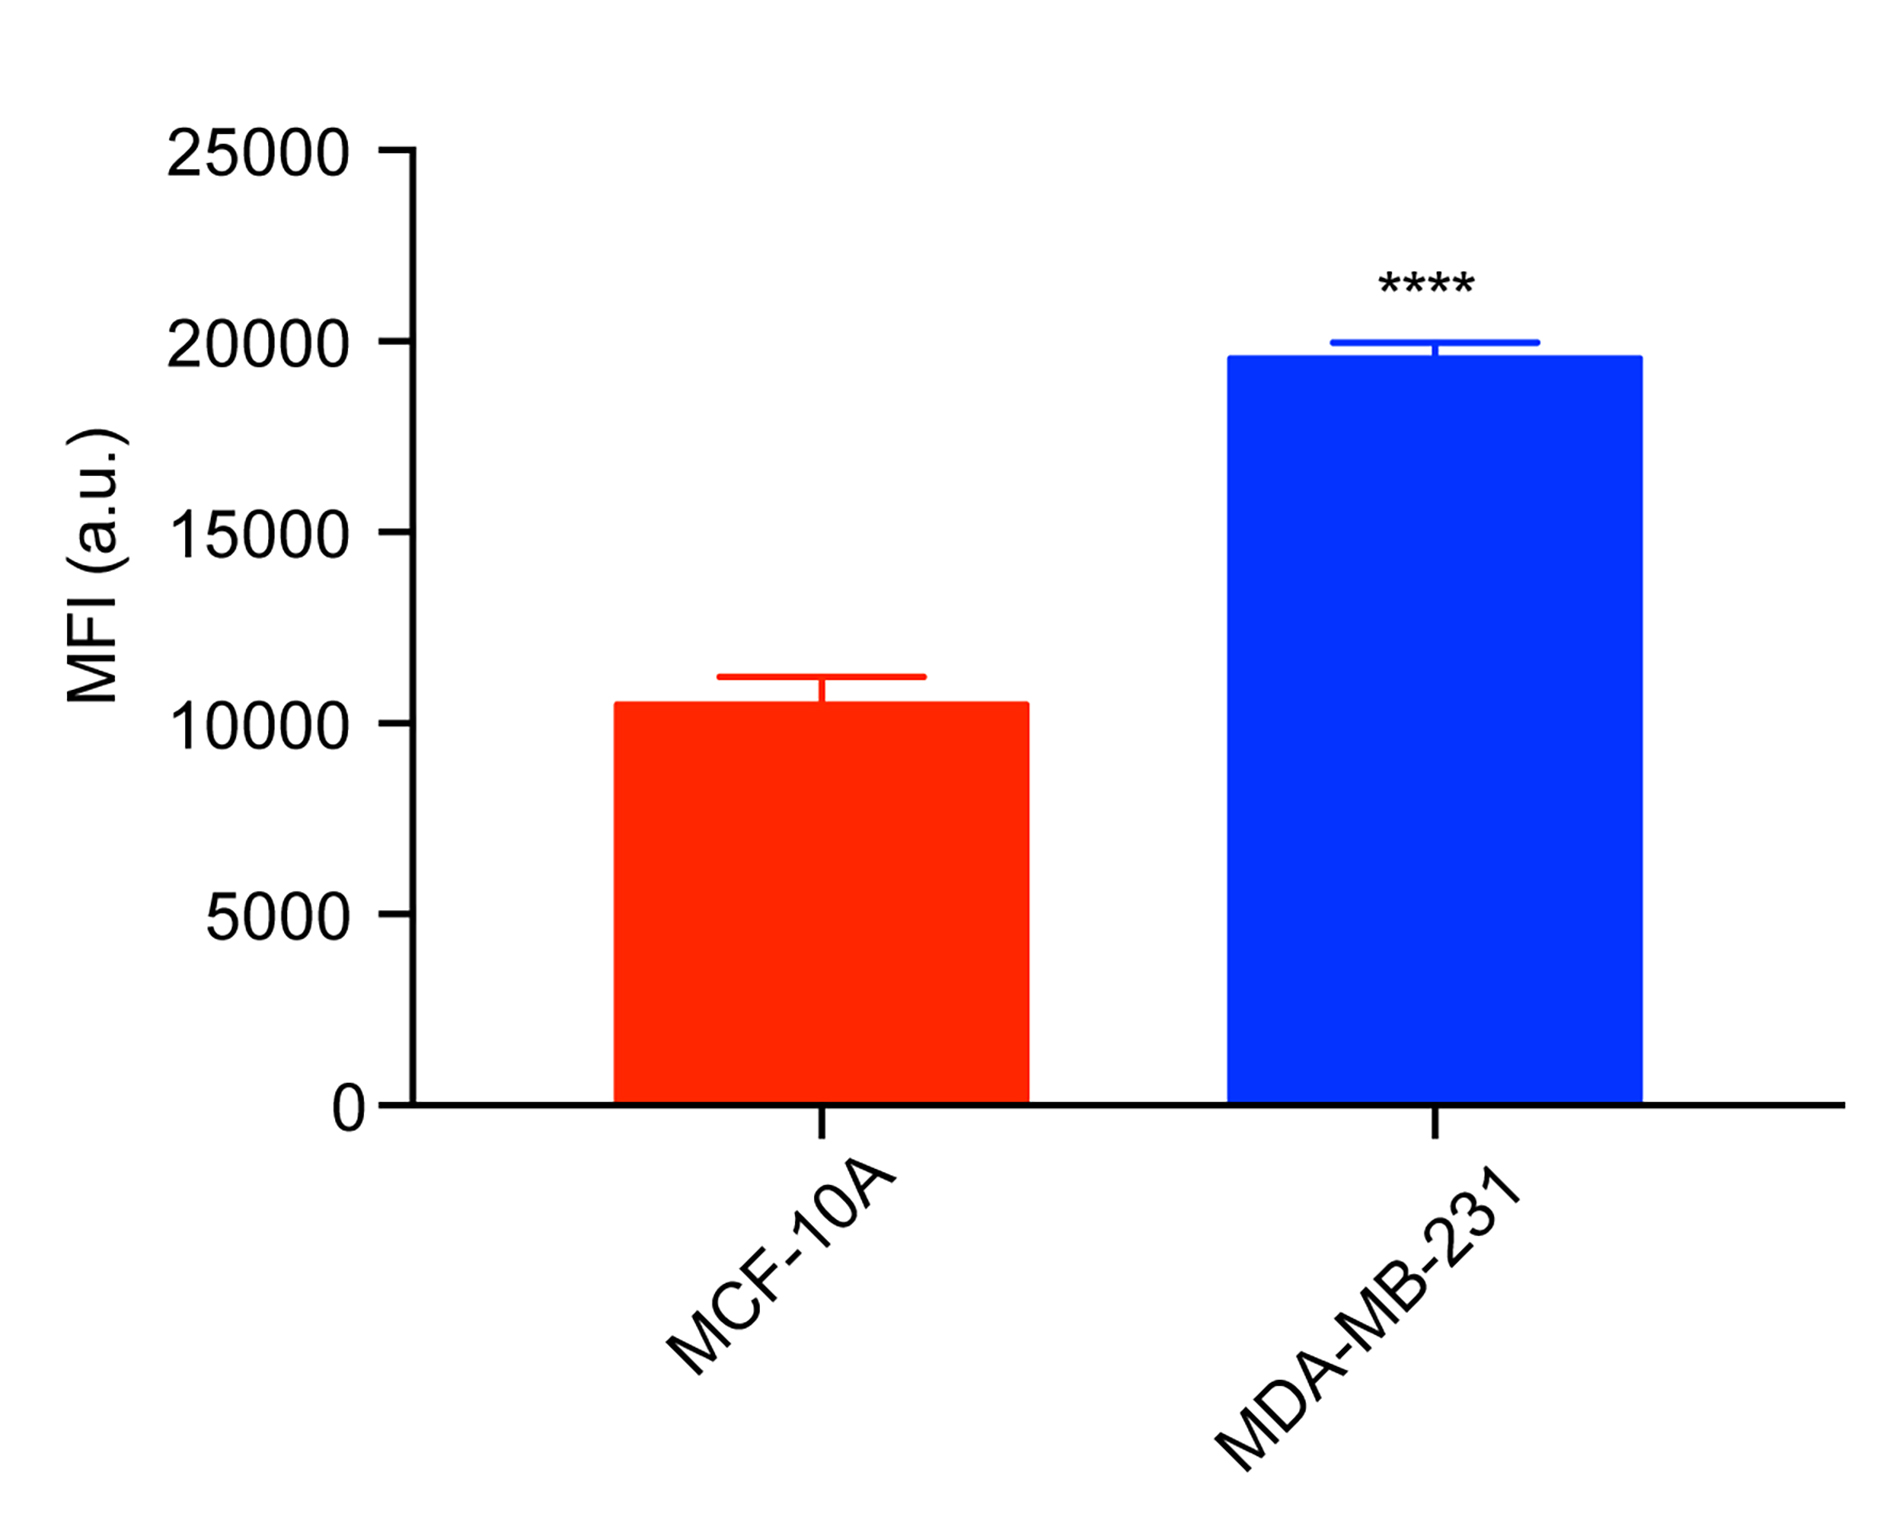
**

**Figure S3.** Flow cytometryanalysis of the αvβ3 expression in MDA-MB-231 and MCF-10A cell lines. *****P*<0.0001

**
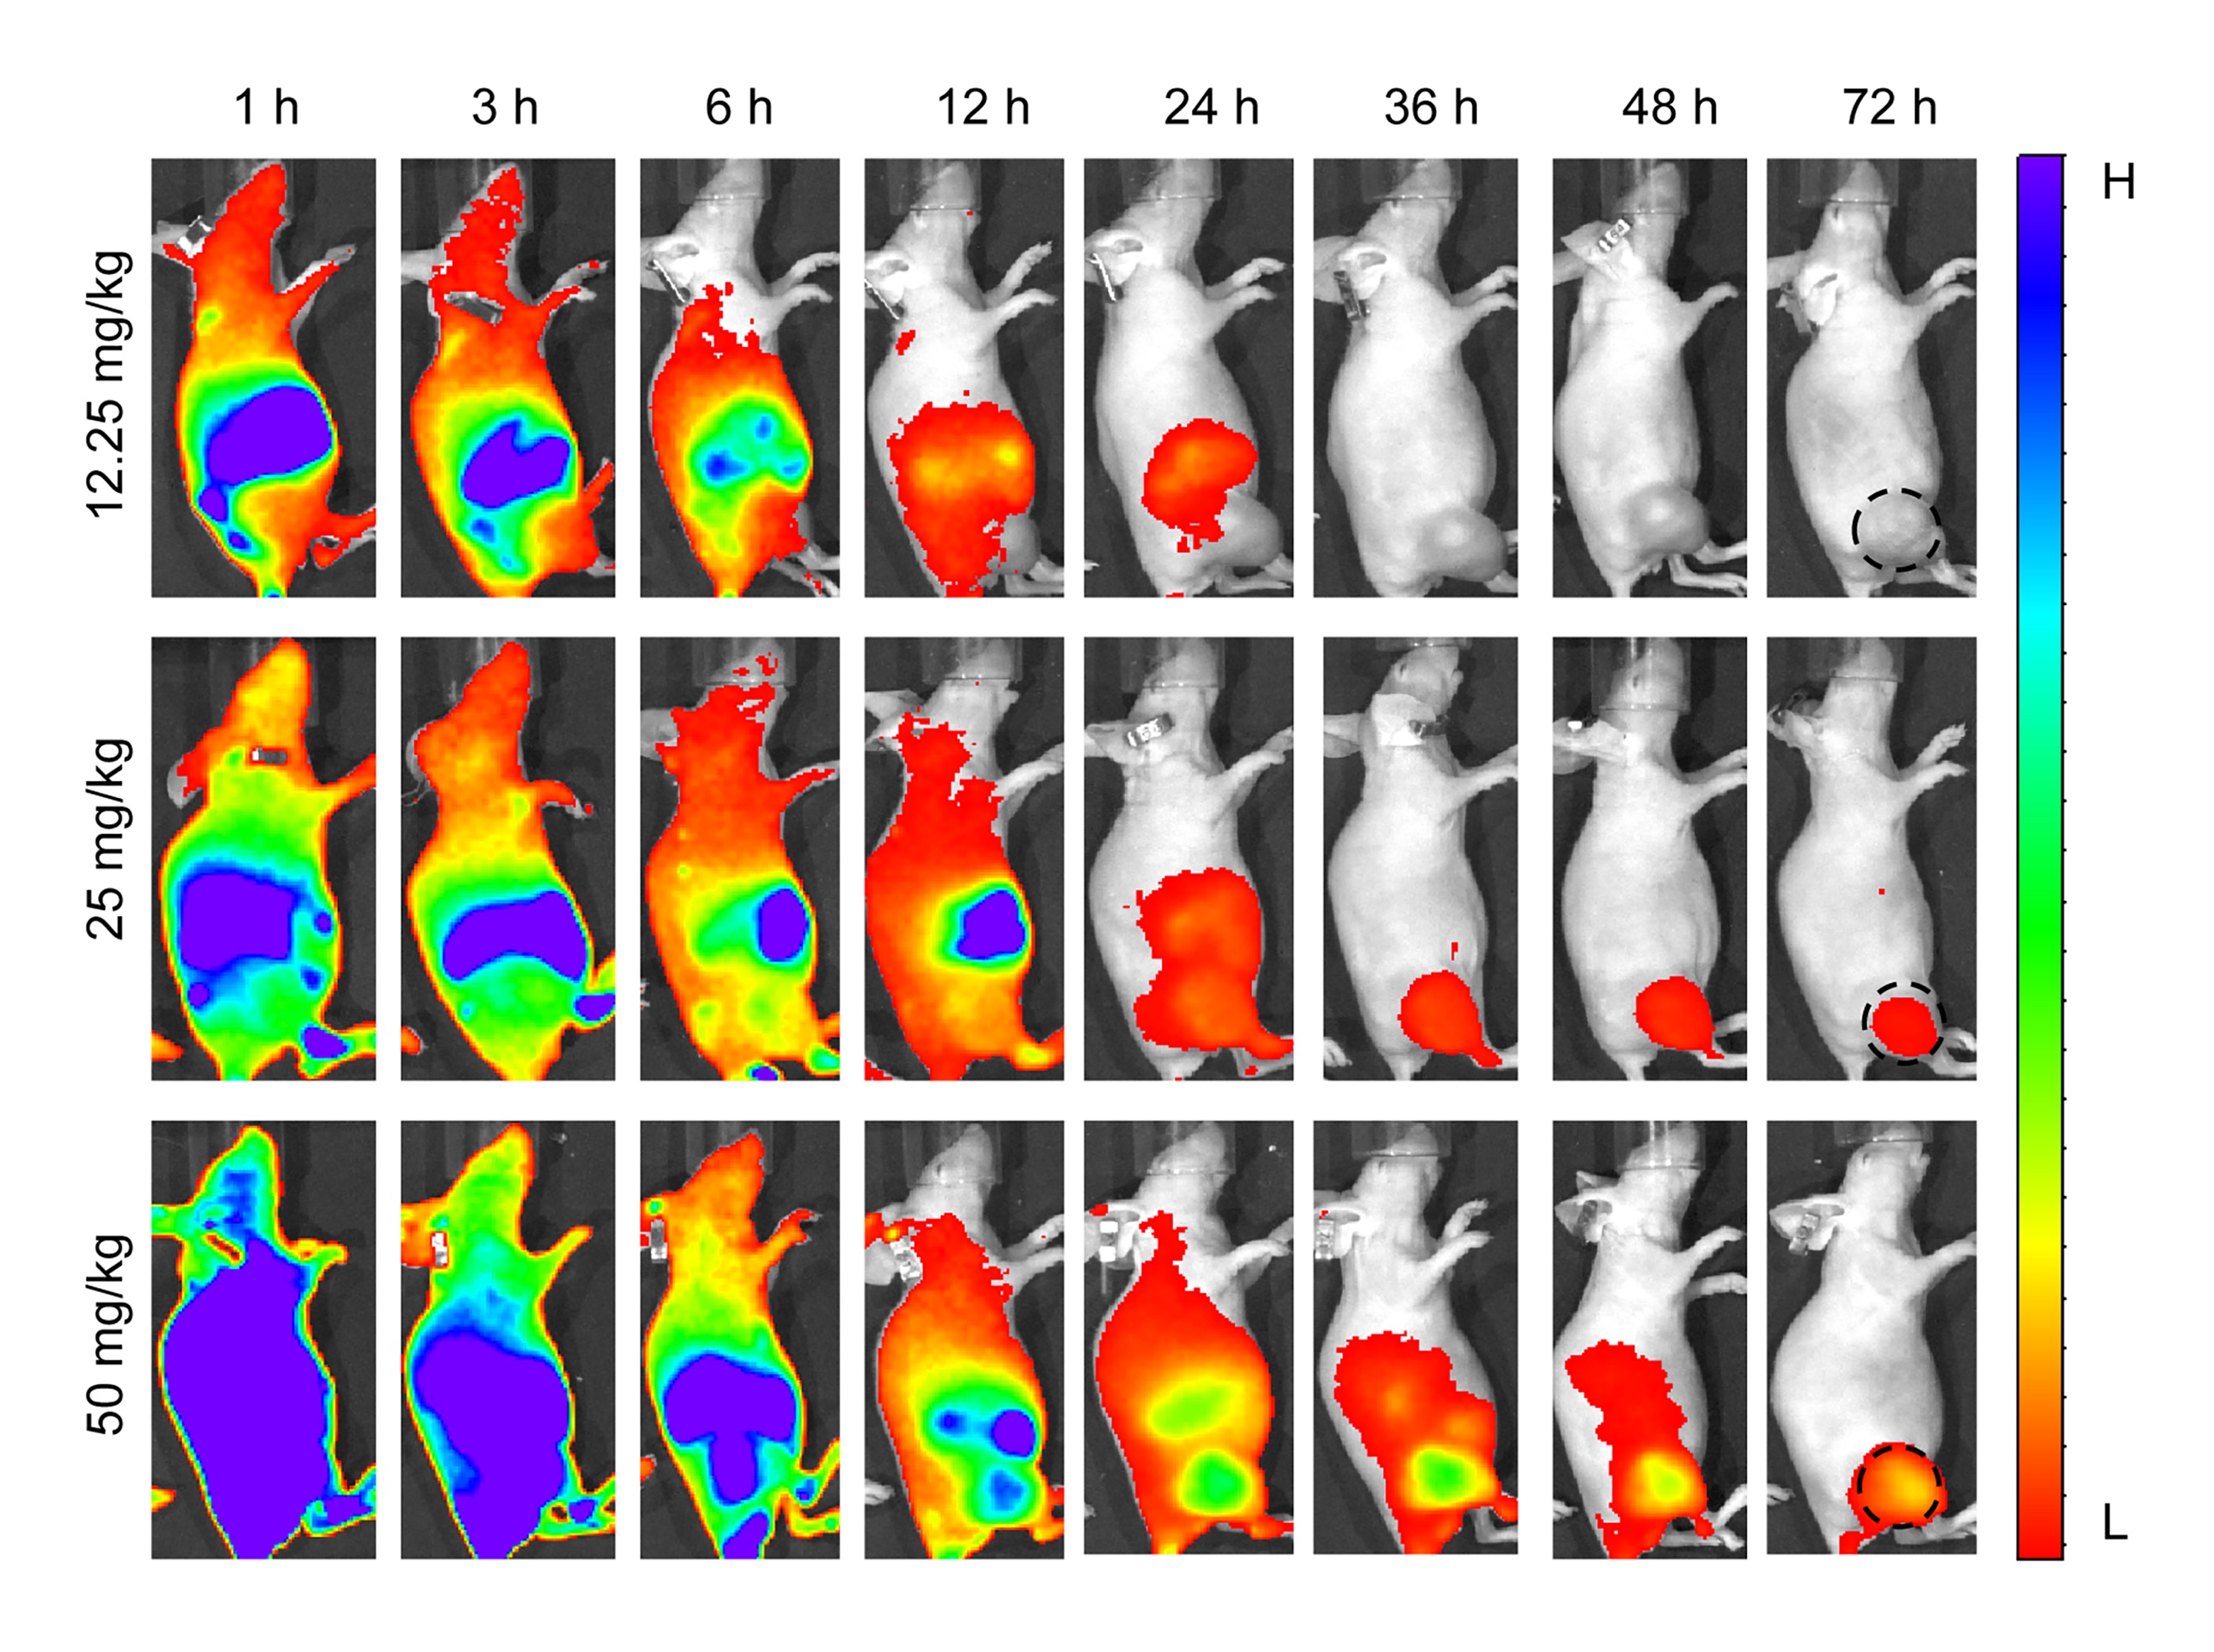
**

**Figure S4.** Fluorescence images of mice after injection with different doses RGD-HBc160/ICG at different time points.

**
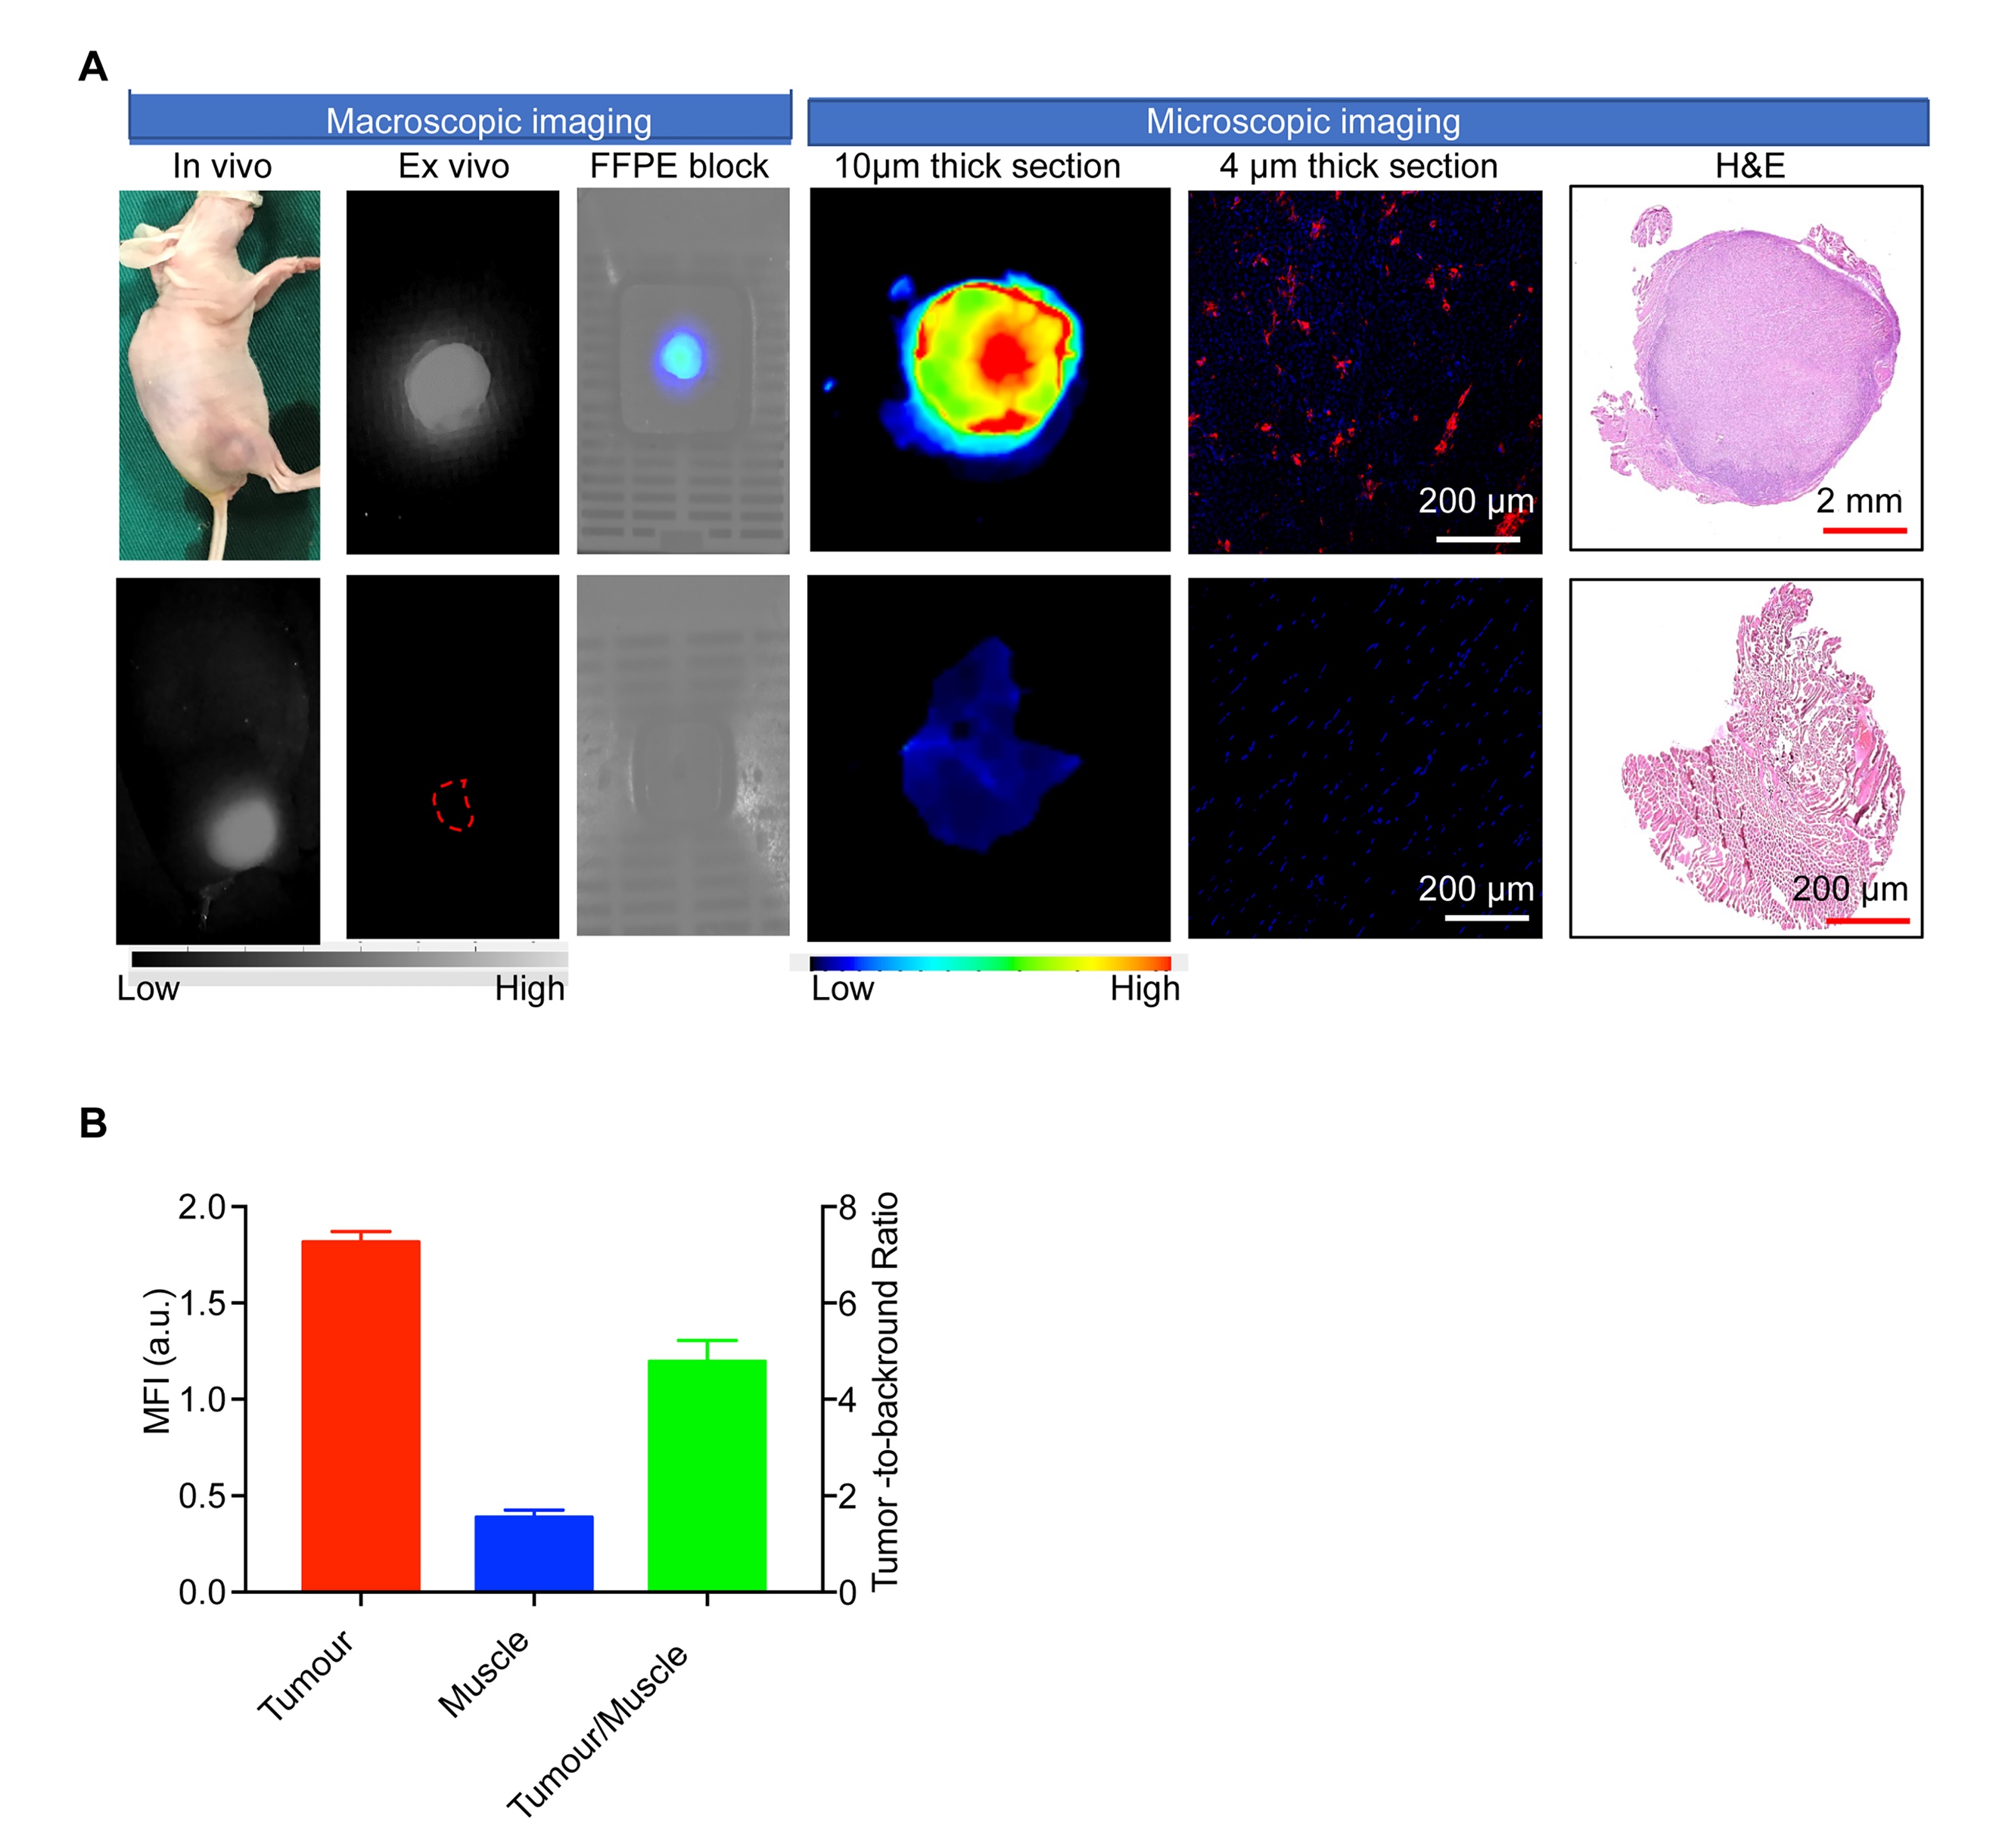
**

**Figure S5.** **(A)**,Corresponding multilevel fluorescence signals at the primary tumor and muscle, and histopathology confirming primary tumor and muscle. **(B)**,Representative quantitative analysis of fluorescence signals of tumor and muscle in 10-μm sections.

**
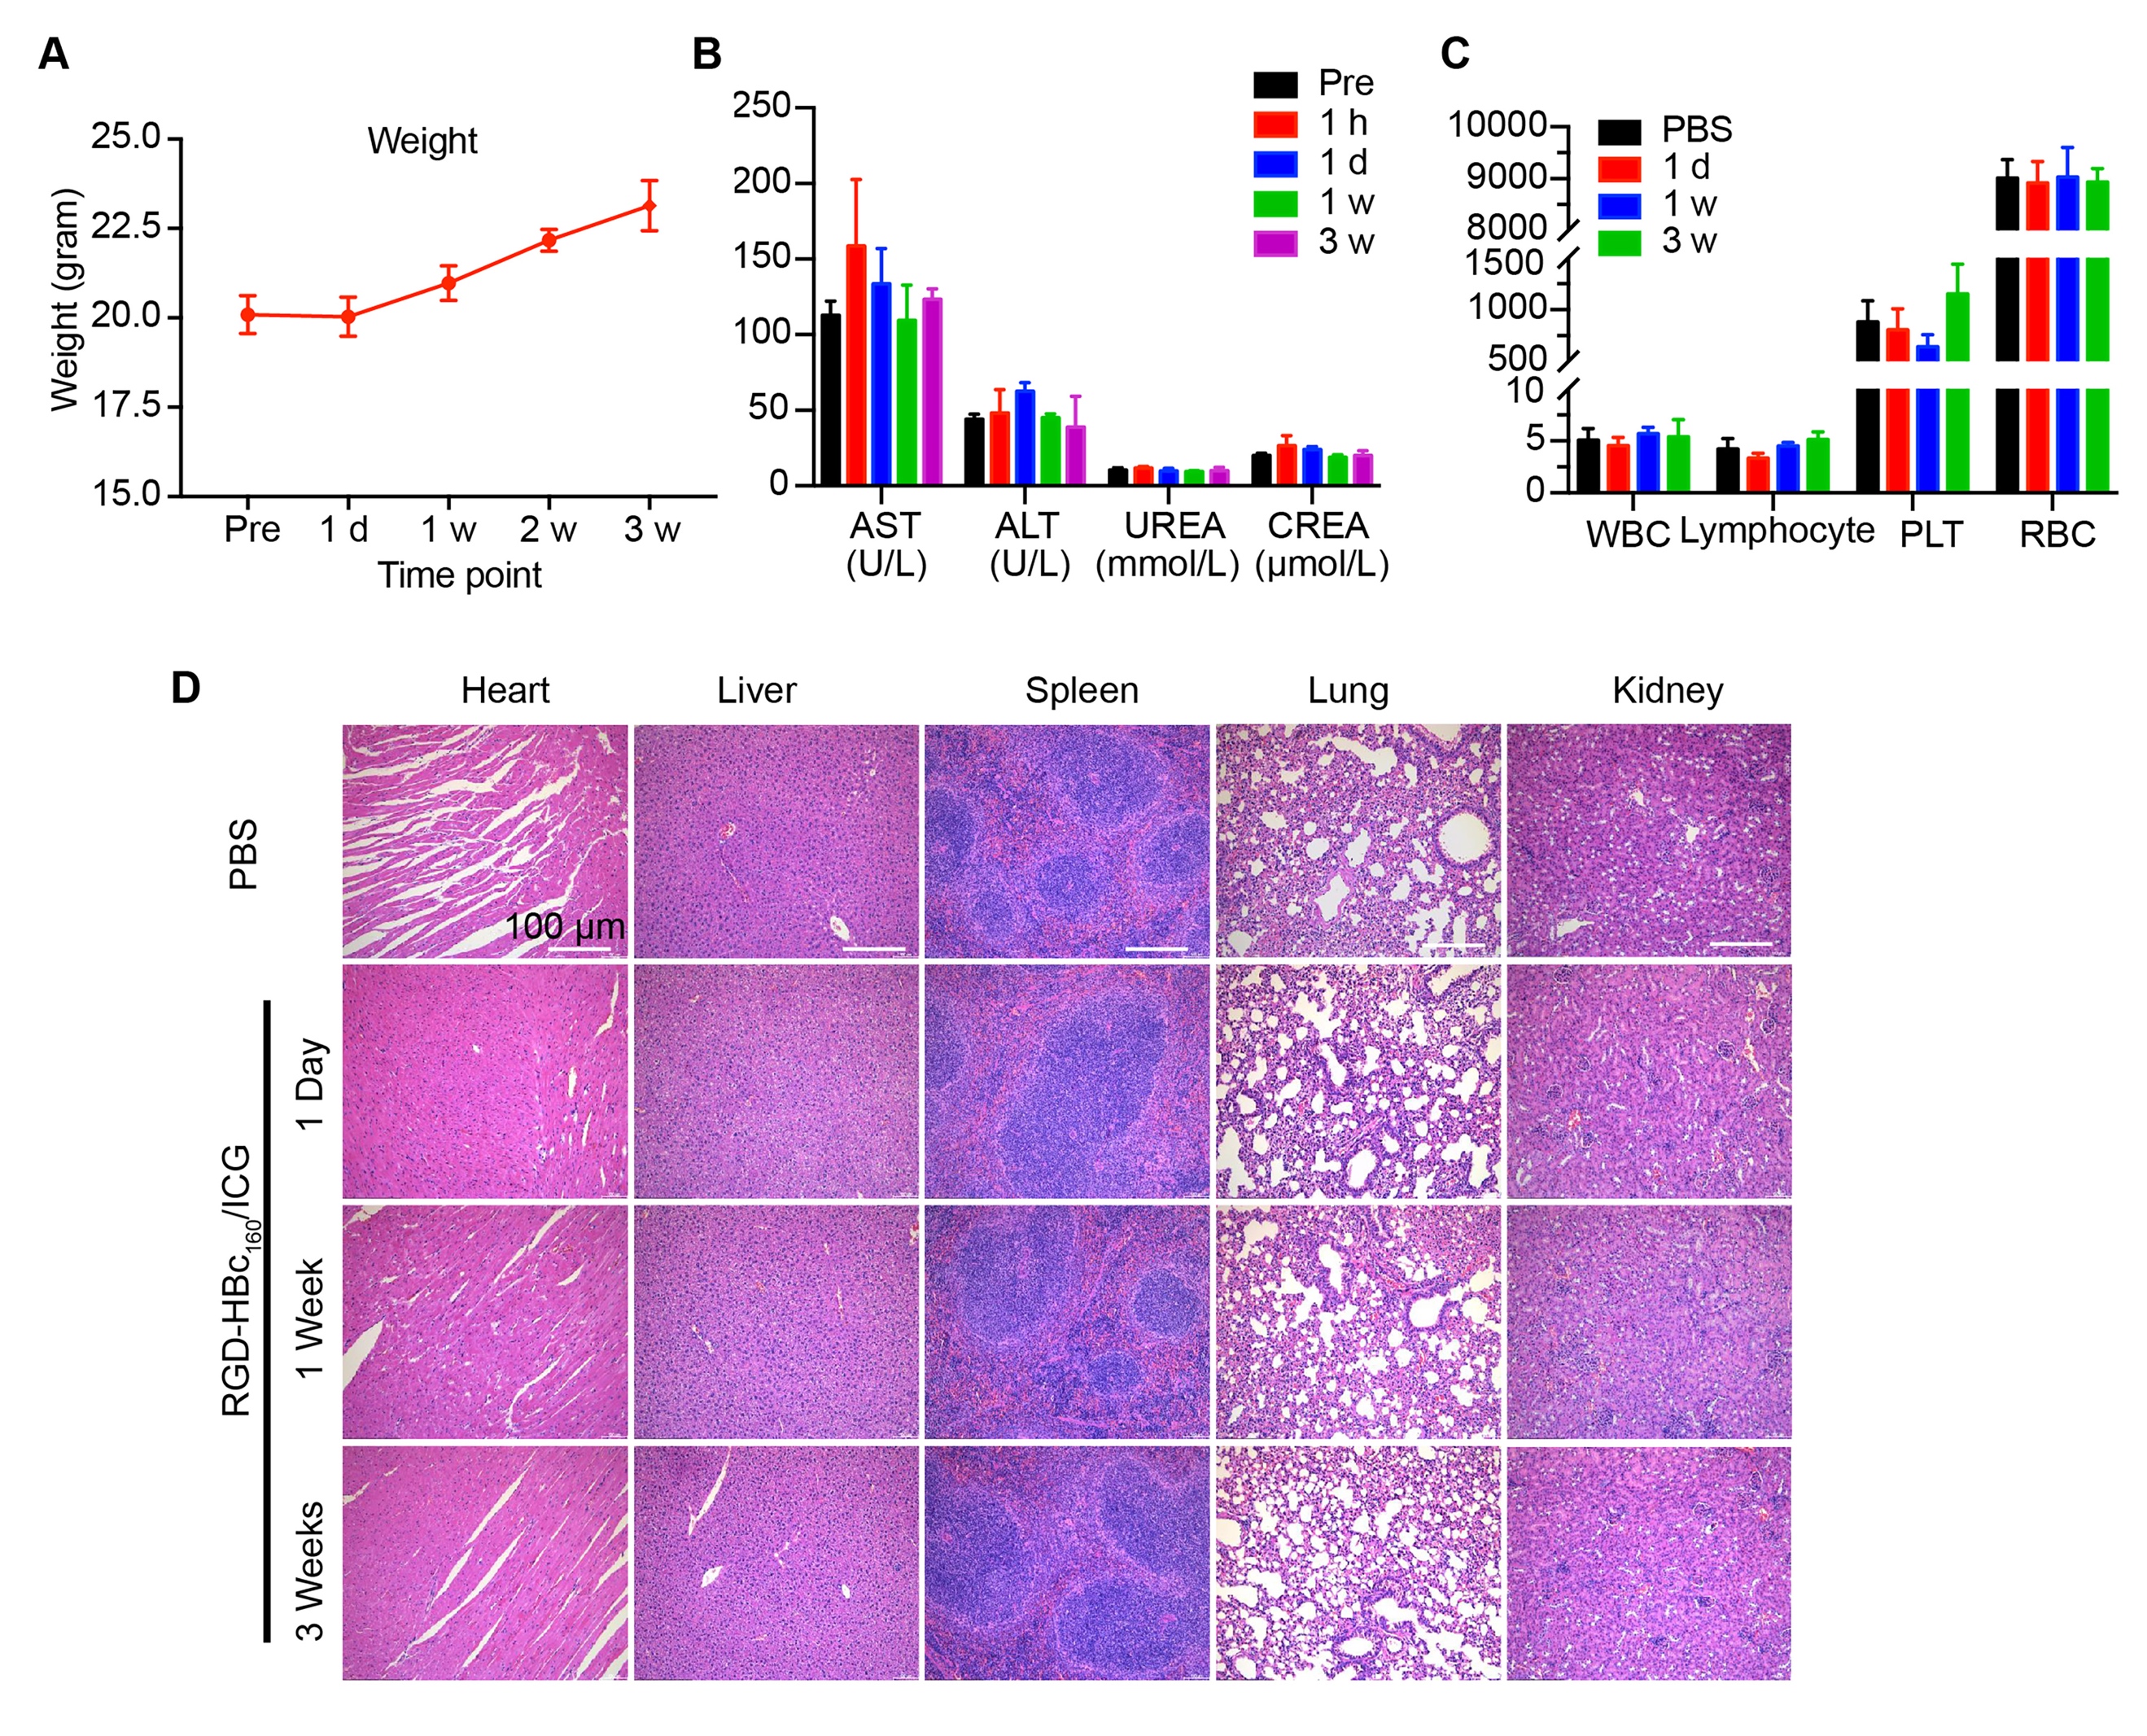
**

**Figure S6.** Represents the weight **(A)**, blood liver function index and renal function index **(B)**, hemocytology changing **(C)**, and H&E stained images of major organs **(D)** over a span of 3 weeks after intravenous injection of RGD-HBc160/ICG (25 mg/kg), PBS were used as a vehicle control.


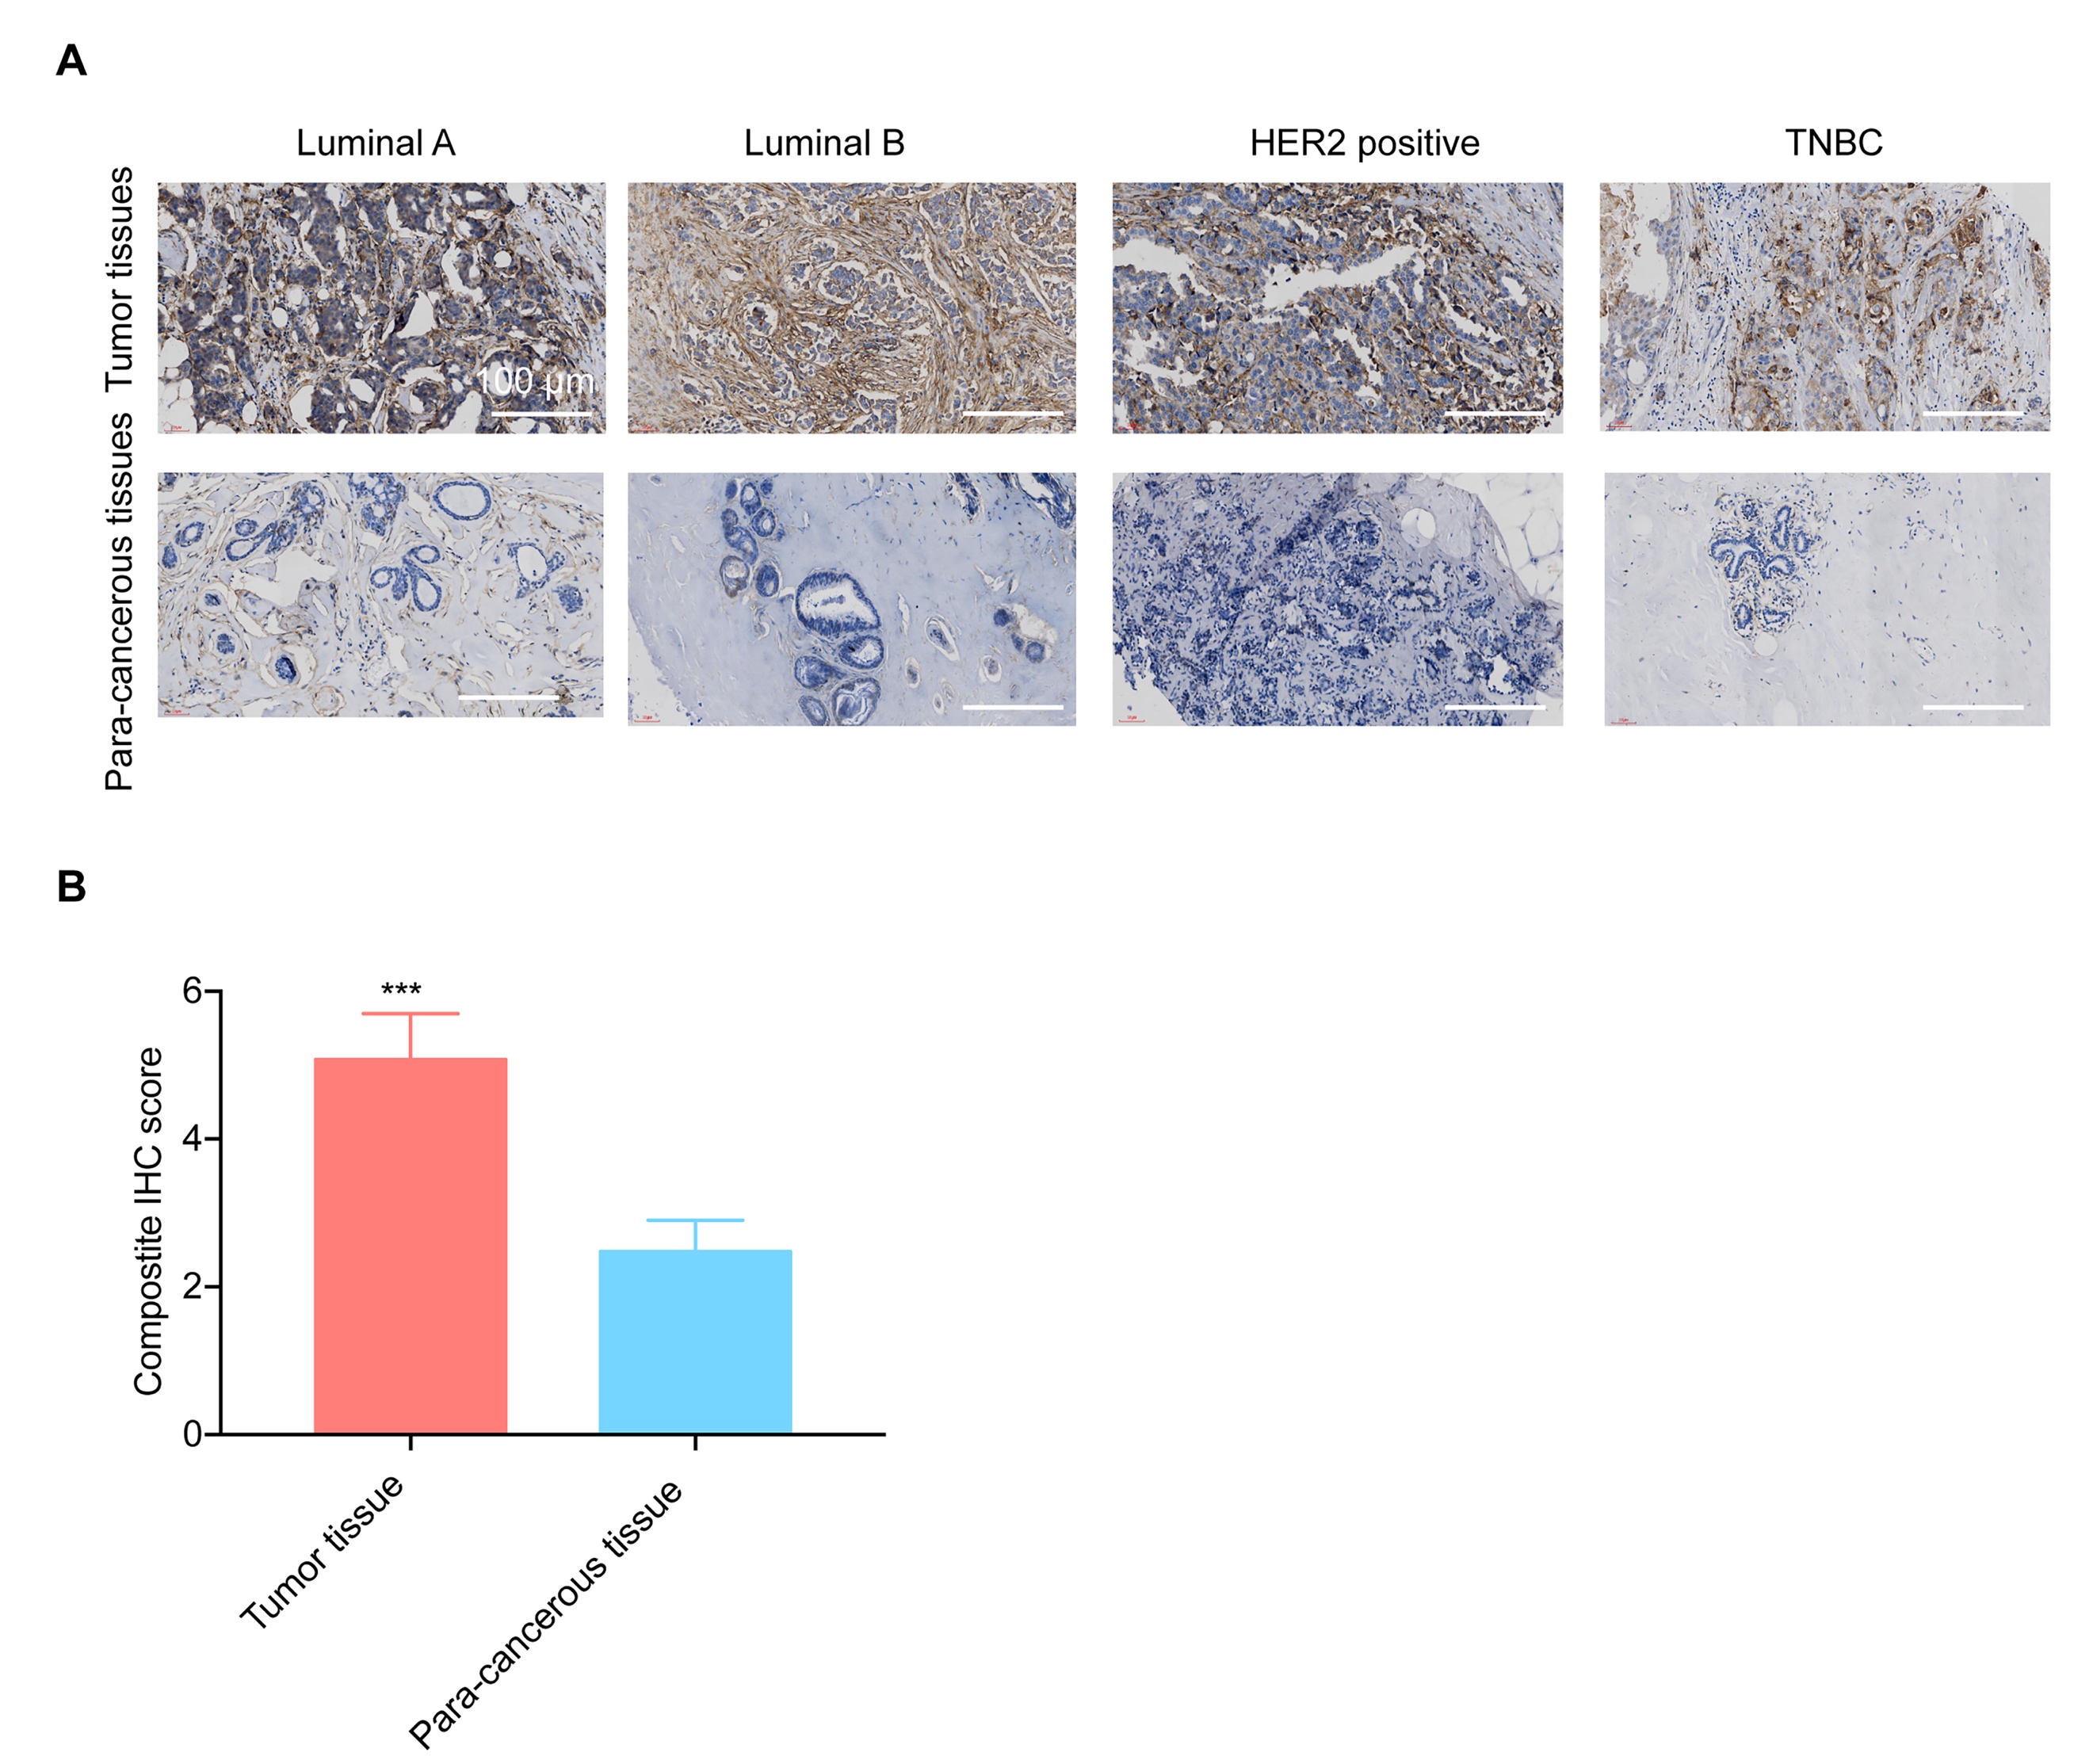


**Figure S7. (A)**, Representation of microscopy images showing representative staining results for αv (brown) from different molecular types in resected cancer and para-cancers tissues obtained from breast cancer patients. **(B)**, showing a statistically difference of the means between the two groups. ***P<0.001

**Table. S1** Representation of IHC scores in αv-stained cancer tissues and the corresponding para-cancerous tissues.

| Tissue types | aIHC score | | | |
| --- | --- | --- | --- | --- |
| 0 | 1-4 (+) | 5-8 (++) | 9-12 (+++) |
| Tumor tissue | 15% (6/40) | 37.5% (15/40) | 32.5% (13/40) | 15% (6/40) |
| Para-cancerous tissues | 40% (16/40) | 35% (14/40) | 22.5% (9/40) | 2.5% (1/40) |

a Immunohistochemical
